# Supplementary material
Source: PubMed Central journal article supplement (PMC5221731)
Supplement: NIHMS70406-supplement-Supplementary_Data_Set_1.pdf [file NIHMS70406-supplement-Supplementary_Data_Set_1.pdf]

**Uncropped blot, autoradiograph and gel images  
for Figures 1, 2, 3, 4 and 6, and Supplementary Figures 1, 3 and 4.**

**Figure 1**

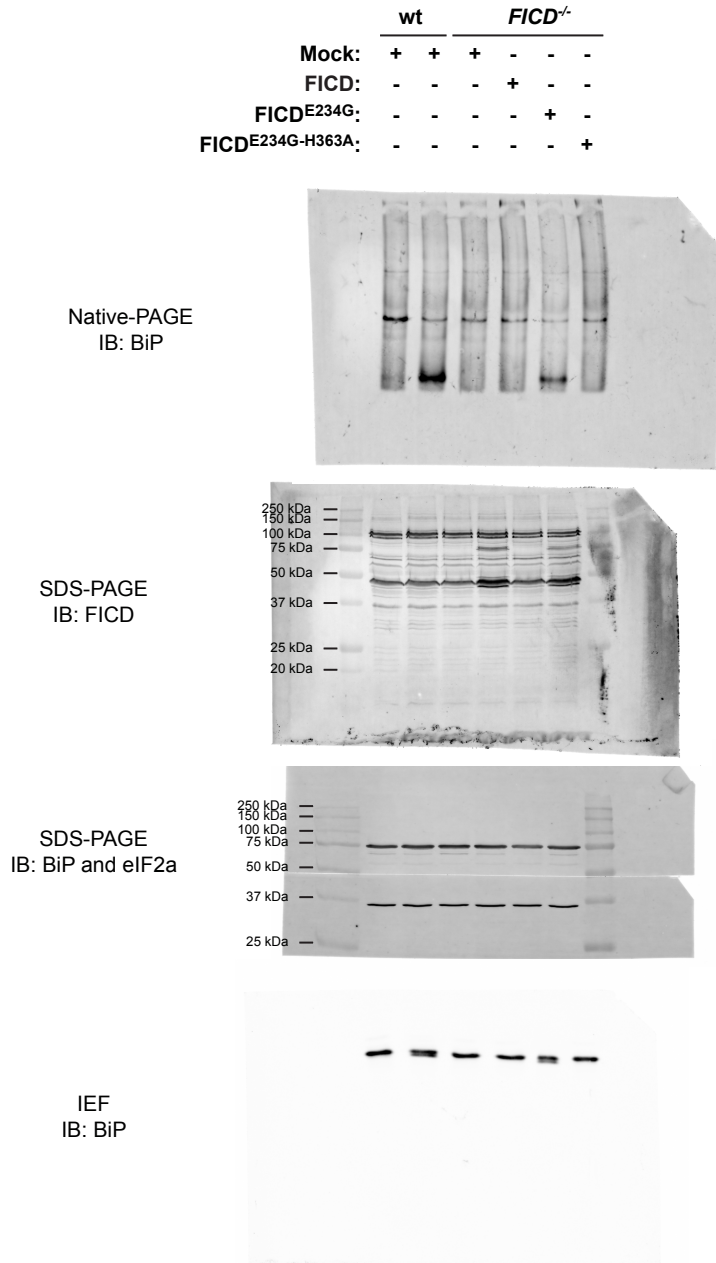

# Figure 2a

## Autoradiographs

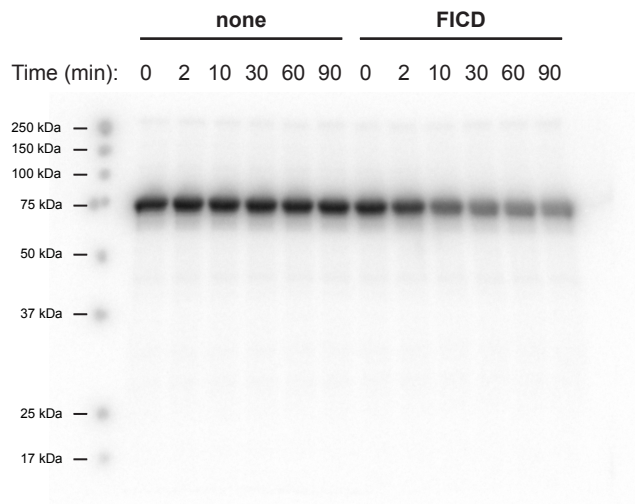

**Gel 1**

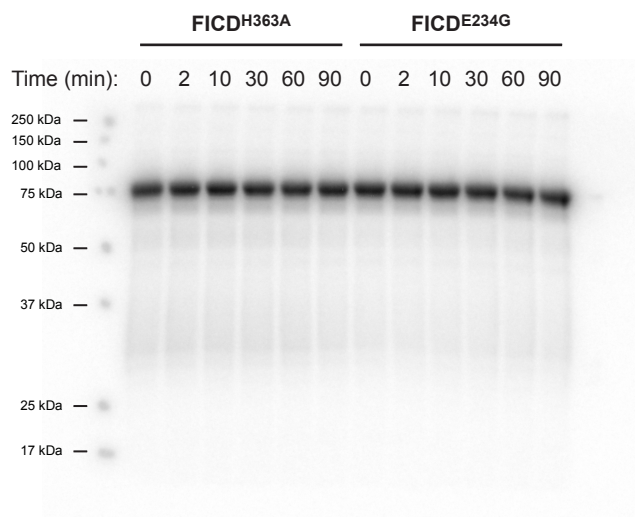

**Gel 2**

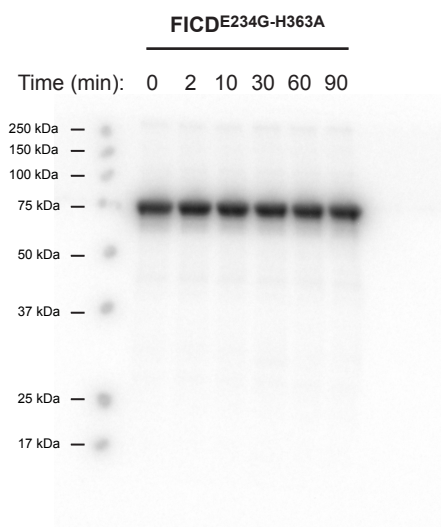

**Gel 3**

Coomassie (CBB) stain (loading control)

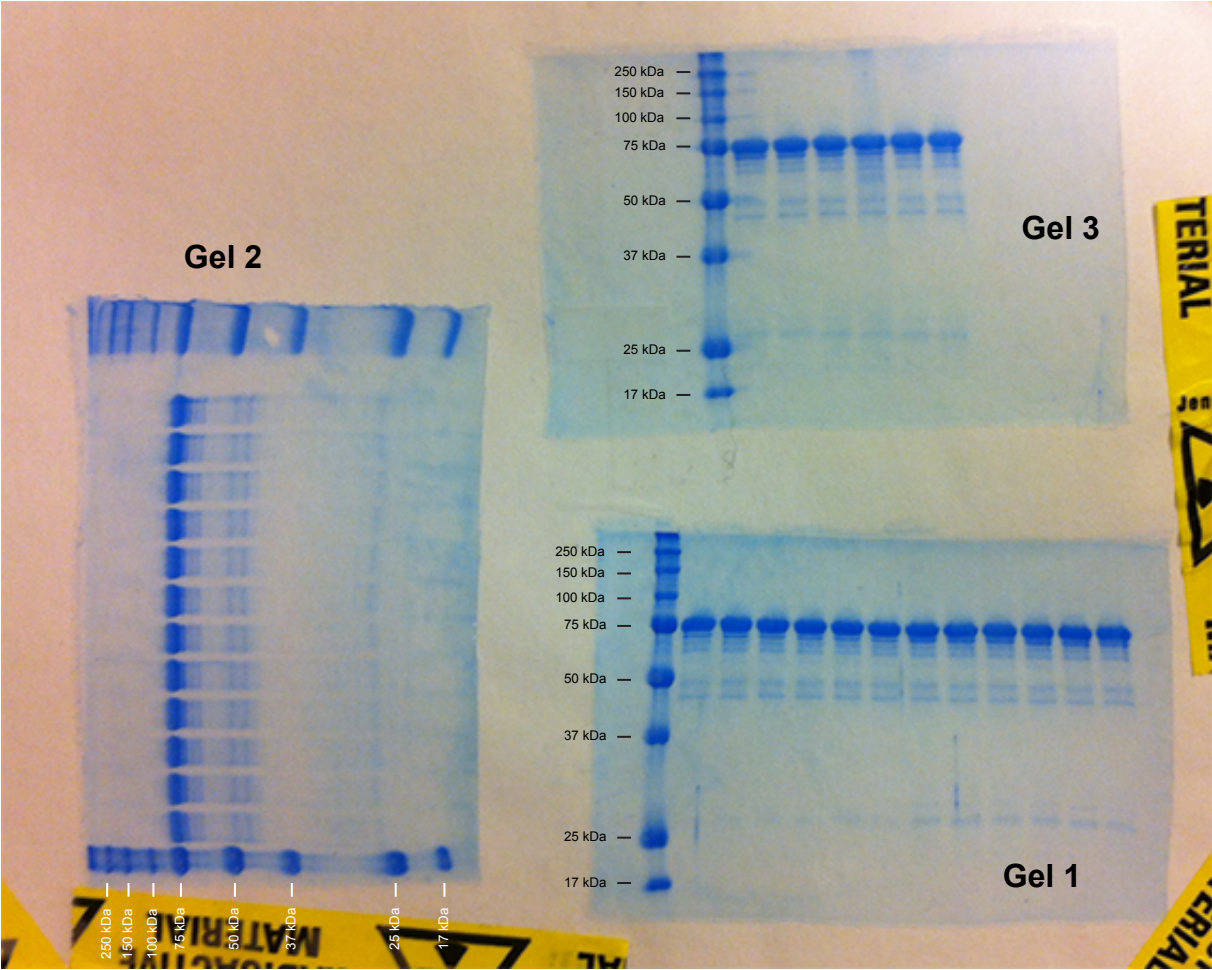

**Figure 2b**

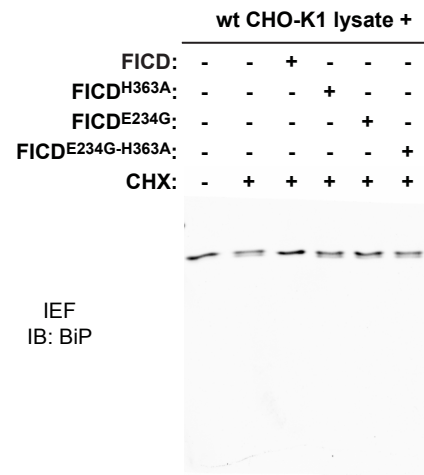

# Figure 2c

## Autoradiographs

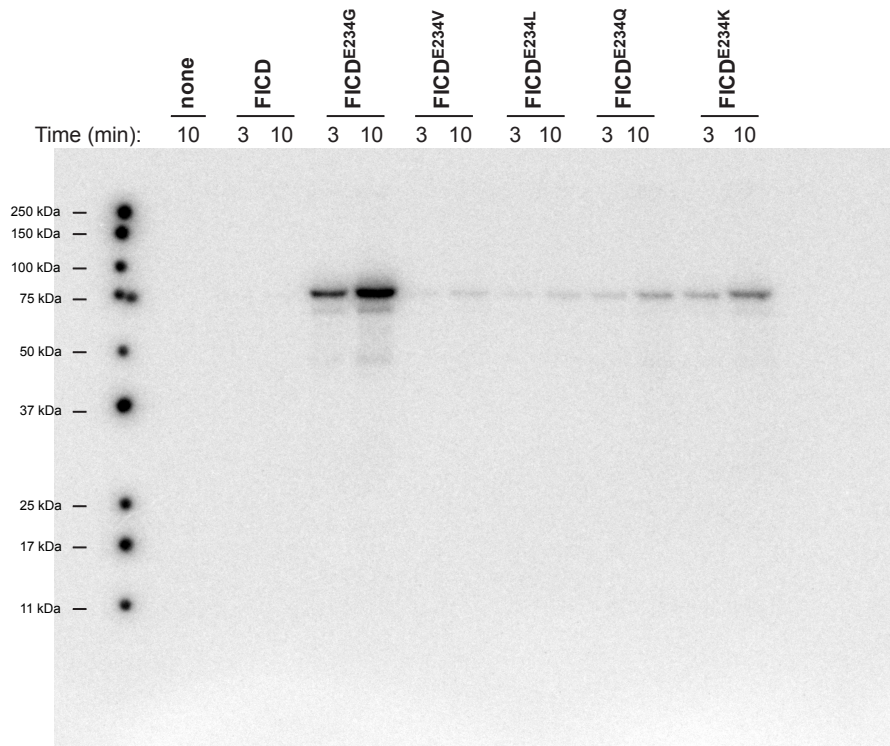

## Coomassie (CBB) stain (loading control)

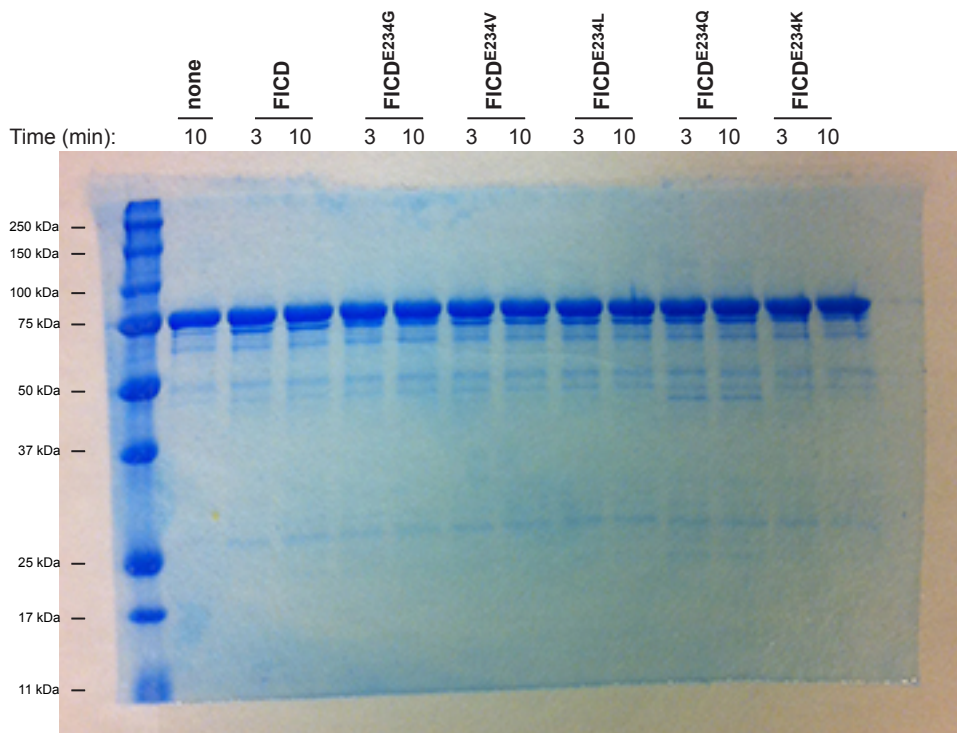

Figure 3d

|                               | BiP-AMP (+ ATP) |   |   |   |   |   |   |   |   |   |
|-------------------------------|-----------------|---|---|---|---|---|---|---|---|---|
| FICD:                         | -               | + | - | - | - | - | + | - | - | - |
| FICD <sup>H363A</sup> :       | -               | - | + | - | - | - | - | + | - | - |
| FICD <sup>E234G</sup> :       | -               | - | - | + | - | - | - | - | + | - |
| FICD <sup>E234G-H363A</sup> : | -               | - | - | - | + | - | - | - | - | + |
| SubA:                         | -               | - | - | - | - | + | + | + | + | + |

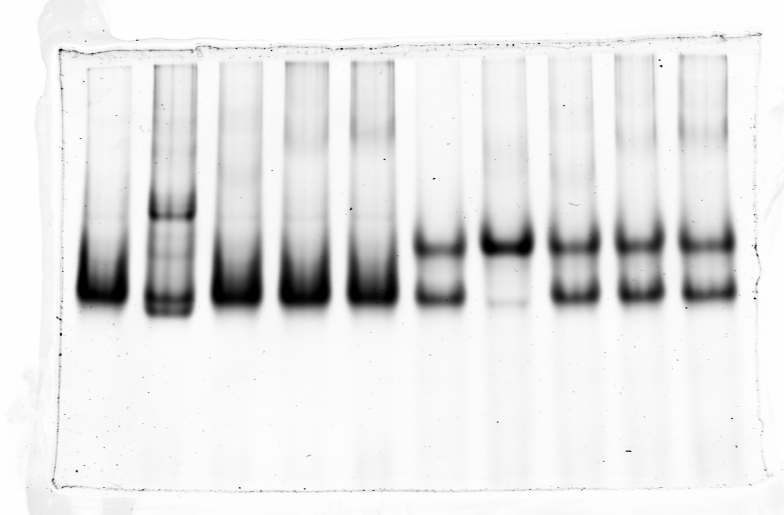

CBB

Figure 3e

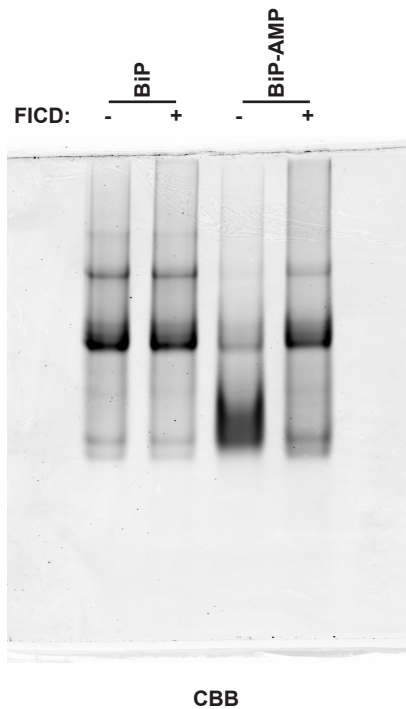

# Figure 4a

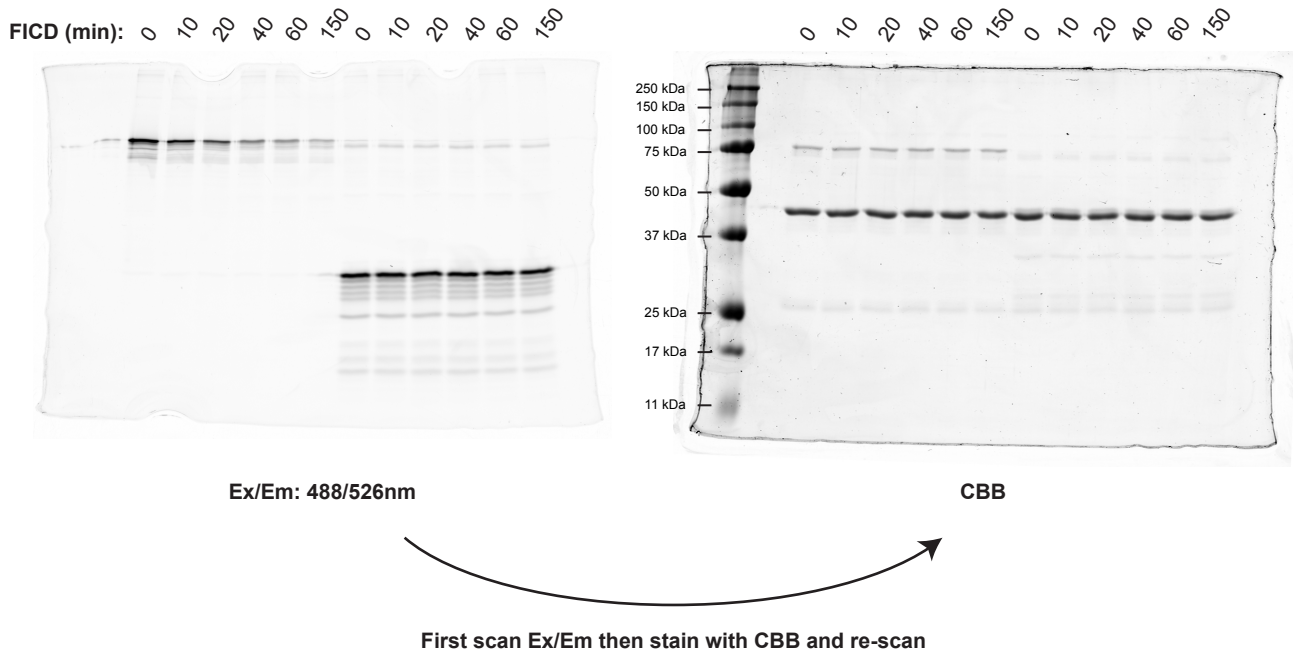



**Figure 6a**

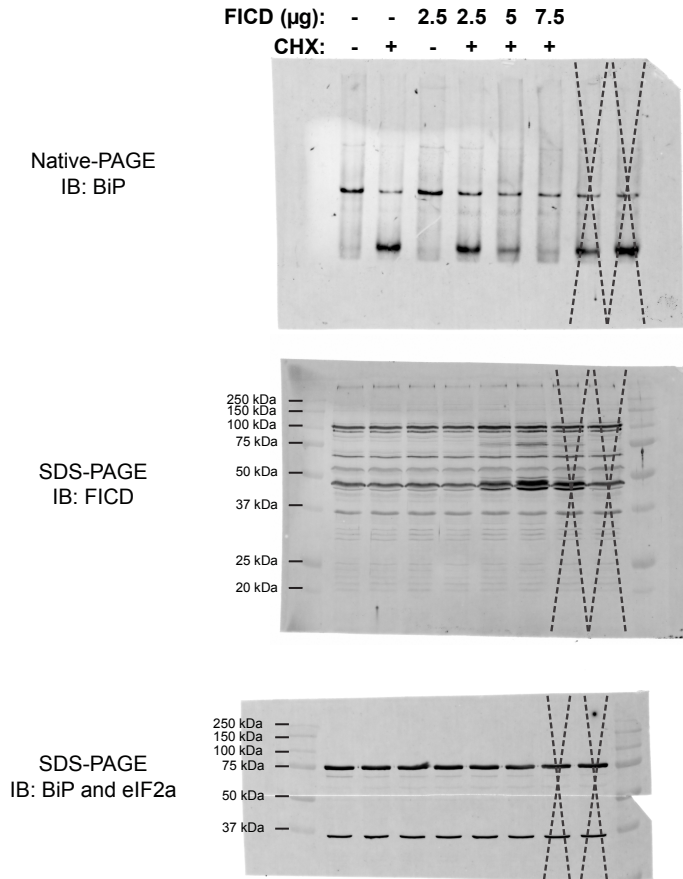

# Supplementary Figure 1a

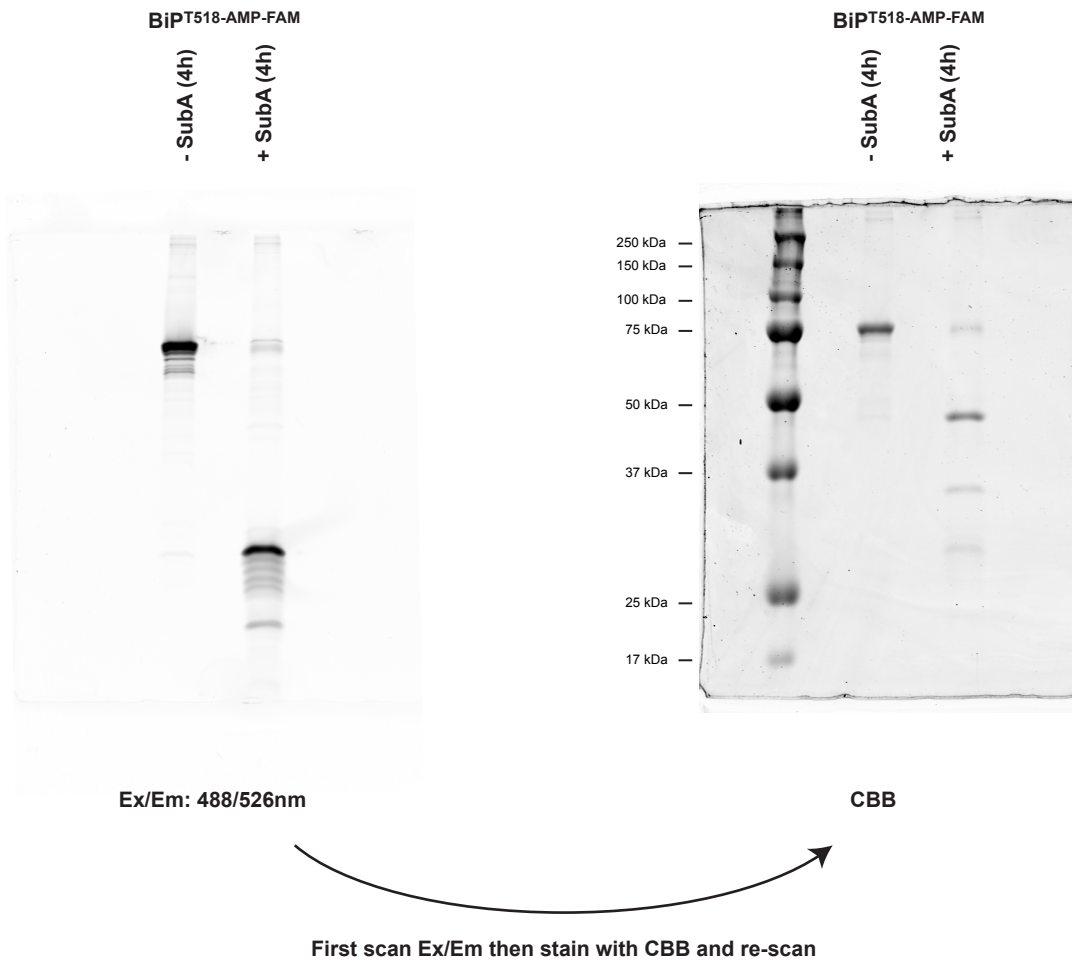

# Supplementary Figure 3a

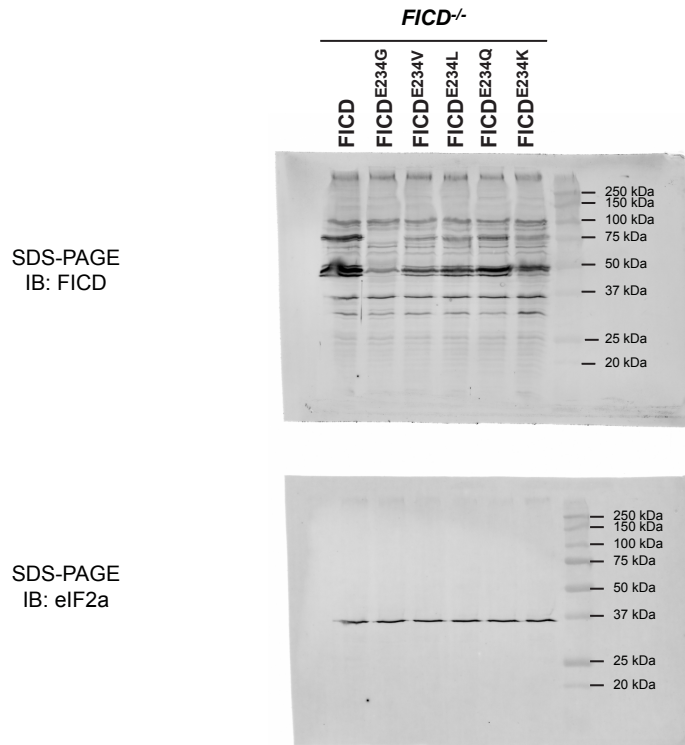

# Supplementary Figure 4b

|                  |   |   |   |   |   |   |   |
|------------------|---|---|---|---|---|---|---|
| mCherry:         | + | + | + | + | - | - | - |
| FICD:            | - | + | - | - | + | - | + |
| FICDE234G:       | - | - | + | - | - | + | + |
| FICDE234G-H363A: | - | - | - | + | + | + | - |

Native-PAGE  
IB: BiP

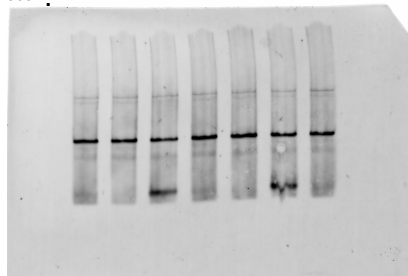

wt

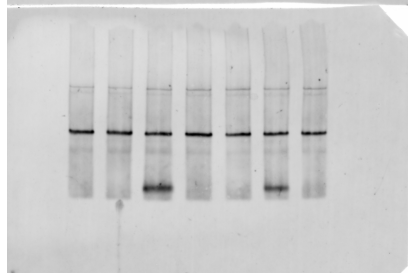

*FICD*<sup>-/-</sup>

SDS-PAGE  
IB: FICD

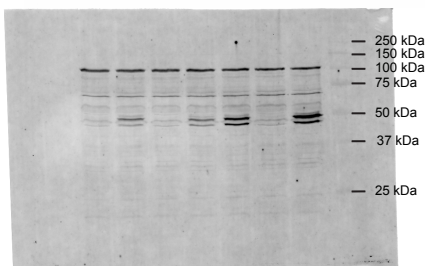

wt

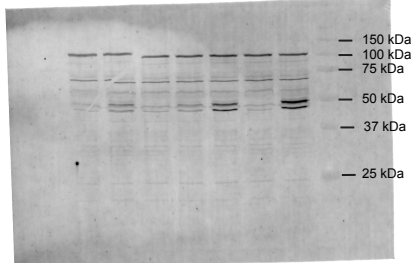

*FICD*<sup>-/-</sup>

SDS-PAGE  
IB: BiP and eIF2a

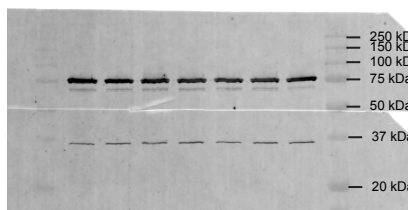

wt

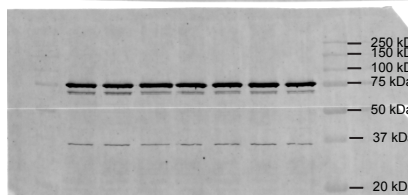

*FICD*<sup>-/-</sup>
